# Supplementary material for: Identification and characterization of a new source of adult human neural progenitors
Source: PubMed Central journal article supplement (PMC5596556; doi:10.1038/cddis.2017.368), 2017-08-10

## **Supplementary information**

### **Inventory of supplemental information**

Supplementary Table 1 (Belongs to Fig. 1)

Supplementary Table 2 (Belongs to Fig. 2)

Supplementary Fig. 1 (Belongs to Fig. 2)

Supplementary Fig. 2 (Belongs to Fig. 2)

Supplementary Table 3 (Belongs to Fig. 2)

Supplementary Fig. 3 (Belongs to Fig. 5)

Supplementary Fig. 4 (Belongs to Fig. 5)

Supplementary Fig. 5 (Belongs to Fig. 5)

Supplementary Fig. 6 (Belongs to Fig. 5)

Supplementary Fig. 7 (Belongs to Fig. 5)

### **Supplementary Figure legends**

### **Supplementary Method Tables**

## Supplementary Figure legends

**Supplementary Fig. 1** (Belongs to Fig. 2). Flow cytometry analysis showing the differences in marker expression between human dermal fibroblasts and primary cells expanded in serum-containing conditions. Fibroblasts lacked the expression of several MSC/pericytes markers including CD105, CD146 and PDGF-b, and NSC/NPC markers like SOX8, SOX9, and Nurr1, but do express very high level of CD248 and other well-known markers for MSCs/pericytes. See [Table S2](#) for other markers. The FACS gate was set on total population after excluding cell debris and doublets using the Fluorescence Minus One Control strategy.

**Supplementary Fig. 2** (Belongs to Fig. 2). Flow cytometry analysis showing the change in marker expression of cells that were cultivated in serum-containing conditions (AD10) and then transferred to neurosphere condition (AD10 to NS). The flow cytometry analysis showed that the cells downregulated and lost the marker expression of MSC (right panel), NPC and neural cells (left panel) at the same time, as well, cells seemed to die stopped proliferating as indicated by Ki67 staining (end of right panel).

**Supplementary Fig.3** (Belongs to Fig. 5). Principal component analysis 2D plots.

a) PCA1 vs PCA2, b) PCA1 vs PCA3 and c) PCA2 vs PCA3.

**Supplementary File 1:** Functional annotation analysis showing genes 2321 DEGs, the most variable DEGs (1440) and the most variable DEGs under especially stringent filtering (224) and pathways that are differentially expressed in spheres and adherent cells. See Methods for details on bioinformatics filtering.

**Supplementary Fig. 4** (Belongs to Fig. 5). HCA of the 3883 genes showing the most variable genes after filtering. Included in this analysis are: a) the new samples from this study (GEO set number pending), and the samples from our previous analyses (Murrell et al., 2013 and Sandberg et al., 2013). The dendrogram colors red, blue and green specify mesenchymal, neural/proneural and classical subtypes, respectively. The expression values were log<sub>2</sub> transformed.

**Supplementary Fig. 5**(Belongs to Fig. 5). HCA of the 1440 genes showing the most variable genes after filtering of 2321 DEG differentially regulated between Sp and AD.

**Supplementary Fig. 6** (Belongs to Fig. 5). ERK pathway

**Supplementary Fig. 7** (Belongs to Fig. 5). HCA of the 2385 genes showing genes that were differentially expressed between the groups of fresh samples and cultured cells.

**Supplementary Method Tables . Antibodies used for flow cytometry and Immunocytochemistry**

| Directly conjugated antibodies | Producer      | Primary Antibodies                                    | Producer       |
|--------------------------------|---------------|-------------------------------------------------------|----------------|
| CD133/2- APC                   | Miltenyi      | Rabbit anti-alpha smooth muscle Actin ( $\alpha$ SMA) | Abcam          |
| CD133/2- PE                    | Miltenyi      | Goat anti-Chitinase 3-like 1 (YKL40)                  | R & D Systems  |
| CD56-FITC                      | Miltenyi      | Rabbit anti-SOX9 (clone EPR12755)                     | Abcam          |
| CD44-APC                       | eBioscience   | Rabbit anti-SOX8 (H-95)                               | Santa Cruz     |
| CD15-APC                       | Miltenyi      | Mouse anti-SOX5                                       | Abcam          |
| CD15-PE                        | Miltenyi      | Mouse anti-SOX2 (monoclonal antibody)                 | Cell Signaling |
| CD34-APC                       | BD Pharmingen | Goat anti-Vimentin                                    | R & D Systems  |

|              |               |                                     |                |
|--------------|---------------|-------------------------------------|----------------|
| CD146-APC    | Miltenyi      | Mouse anti-MAP2A                    | Millipore      |
| CD31-FITC    | Miltenyi      | Mouse anti-Endosialin, clone B1/35  | Millipore      |
| CD271-APC    | Miltenyi      | Rabbit anti-CD271                   | Abcam          |
| CD166-PE     | BD Pharmingen | Mouse anti-O4, clone 81             | Chemicon       |
| CD9-FITC     | eBioscience   | Mouse anti-hNestin                  | Abcam          |
| CD9-PE       | eBioscience   | Rabbit anti-Ki67 (Clone SP6)        | Abcam          |
| Nestin-AF647 | BD Pharmingen | Rabbit anti-PDGFB                   | Sigma Aldrich  |
| GFAP-FITC    | BD Pharmingen | Mouse anti-PDGFR-B                  | Sigma Aldrich  |
| CXCR4-PE     | Miltenyi      | Rabbit anti-PDGFR- $\alpha$ (D13C6) | Cell Signaling |
| CD59-FITC    | Biologend     | Doublecortin (c-18)                 | Santa Cruz     |
|              |               | Mouse anti-S100 Antibody [8B10]     | Abcam          |
|              |               | Rabbit anti-c-Kit                   | Abcam          |
|              |               | Rabbit anti-GFAP                    | Dako           |
|              |               | Mouse anti-NeuN                     | Millipore      |
|              |               | Mouse anti-CD106                    | eBioscience    |
|              |               | Rabbit anti-EGFR (D38B1)            | Cell Signaling |

**Secondary Antibodies used for FACS and Immunocytochemistry.**

| <b>Secondary Antibodies</b>        | <b>Producer</b>  |
|------------------------------------|------------------|
| Alexa Fluor 488 donkey anti-rabbit | Molecular Probes |
| Alexa Fluor 488 donkey anti-mouse  | Molecular probes |
| Alexa Fluor 647 donkey anti-goat   | Molecular probes |
| Alexa Fluor 647 donkey anti-Rabbit | Molecular probes |



|                              |                   |
|------------------------------|-------------------|
| Alexa 647 donkey anti-mouse  | Life Technologies |
| Alexa 594 Donkey anti-Goat   | Molecular probes  |
| Alexa 594 donkey anti-rabbit | Life Technologies |

**Supplementary Table 1.** Patient diagnosis, age and gender of samples included in this study.

| <b>Sample</b> | <b>Diagnosis</b>      | <b>Age</b> | <b>Gender</b> |
|---------------|-----------------------|------------|---------------|
| H1255         | Hippocampus sclerosis | 51         | Female        |
| H1303         | Cortical dysplasia    | 1          | Male          |
| H1304         | Normal temporal lobe  | 24         | Female        |
| H1317         | Hippocampus sclerosis | 44         | Female        |
| H1339         | Hippocampus sclerosis | 33         | Female        |
| H1401         | Cortical dysplasia    | 45         | Female        |
| H1404         | Hippocampus sclerosis | 44         | Male          |
| H1411         | Hippocampus sclerosis | 42         | Female        |
| H1423         | Normal hippocampus    | 43         | Female        |
| H1433         | Hippocampus sclerosis | 26         | Female        |
| H1434         | Normal temporal lobe  | 23         | Female        |
| H1446         | Hippocampus sclerosis | 29         | Female        |
| H1702         | Hippocampus sclerosis | 22         | Male          |
| H1703         | Cortical dysplasia    | 49         | Female        |

# Supplementary Fig. 1

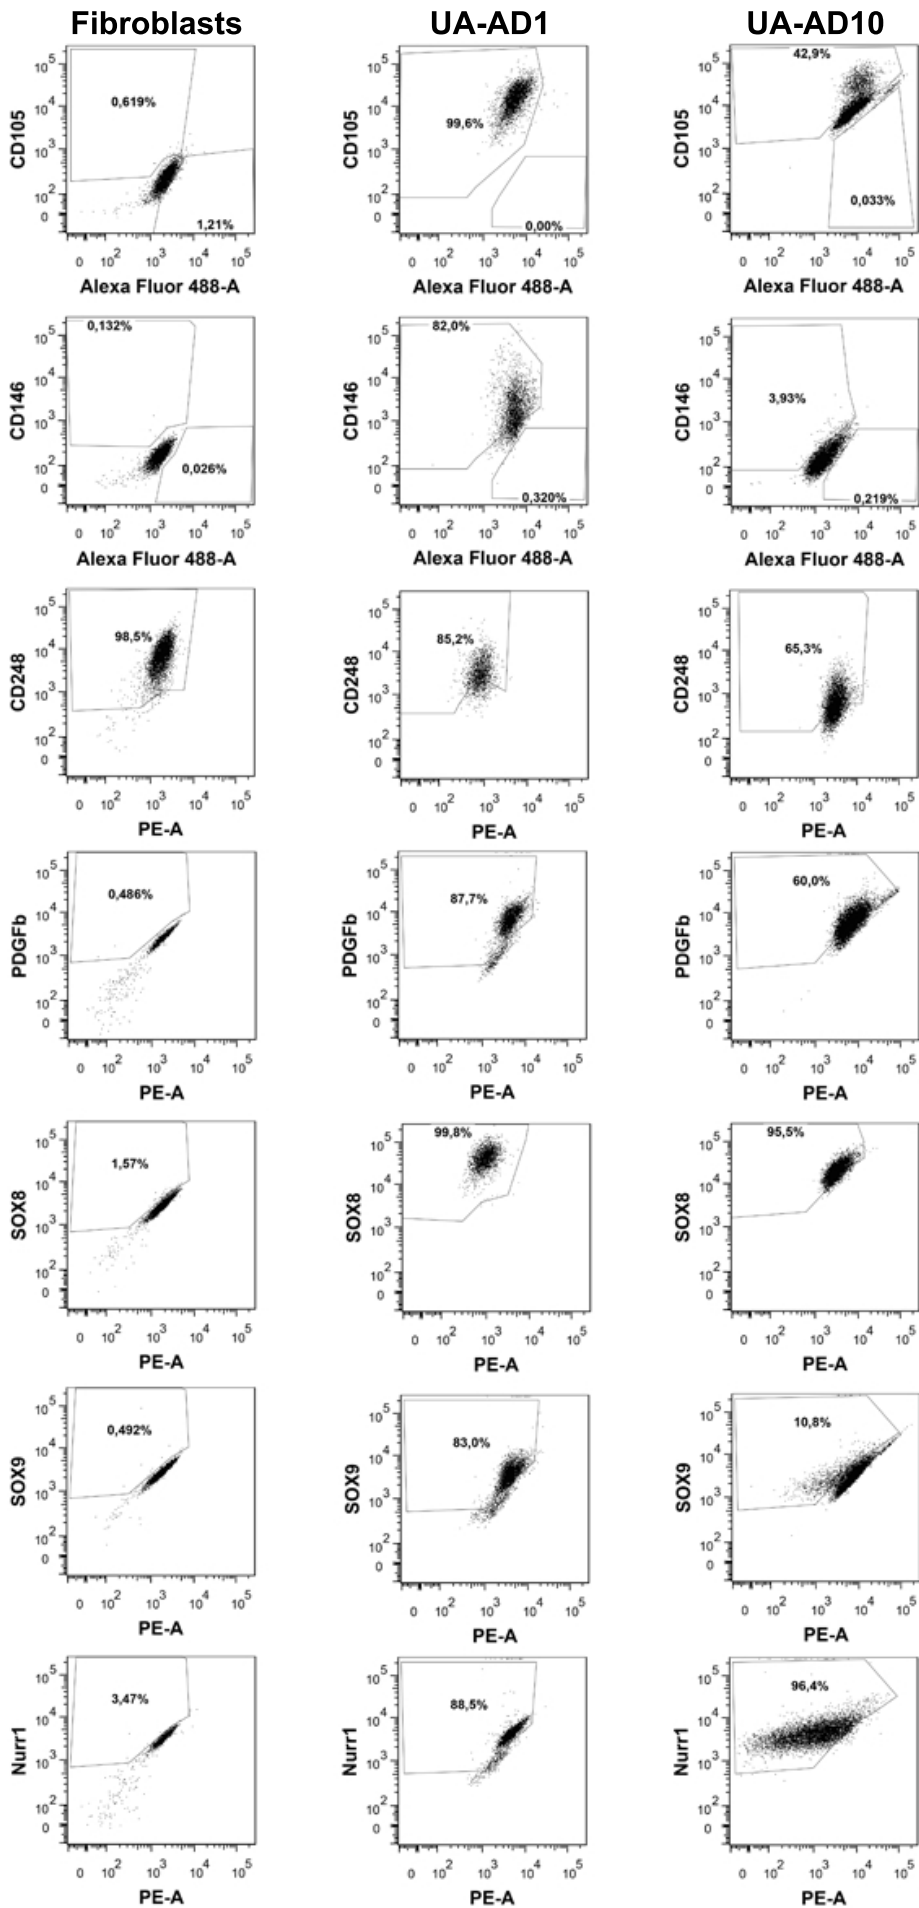

MSC/pericyte markers

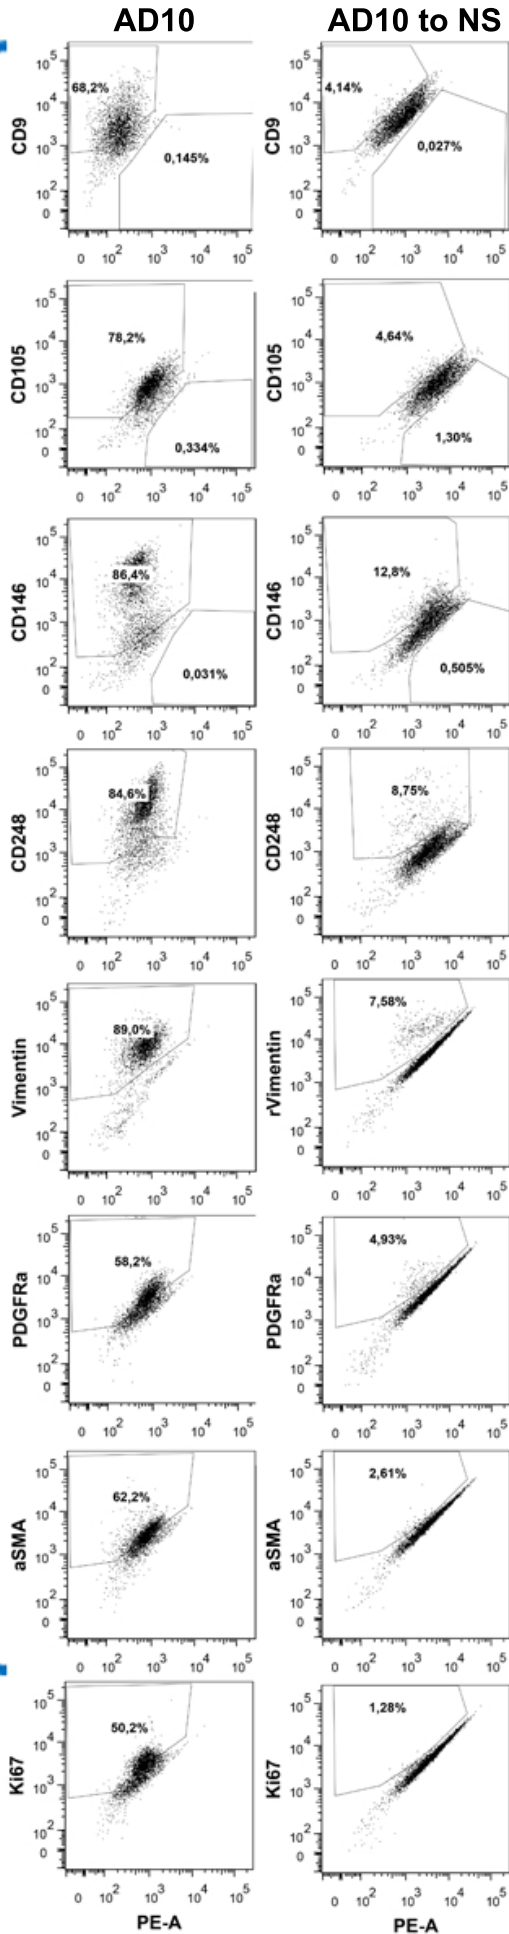

NSC/NPC and Neural markers

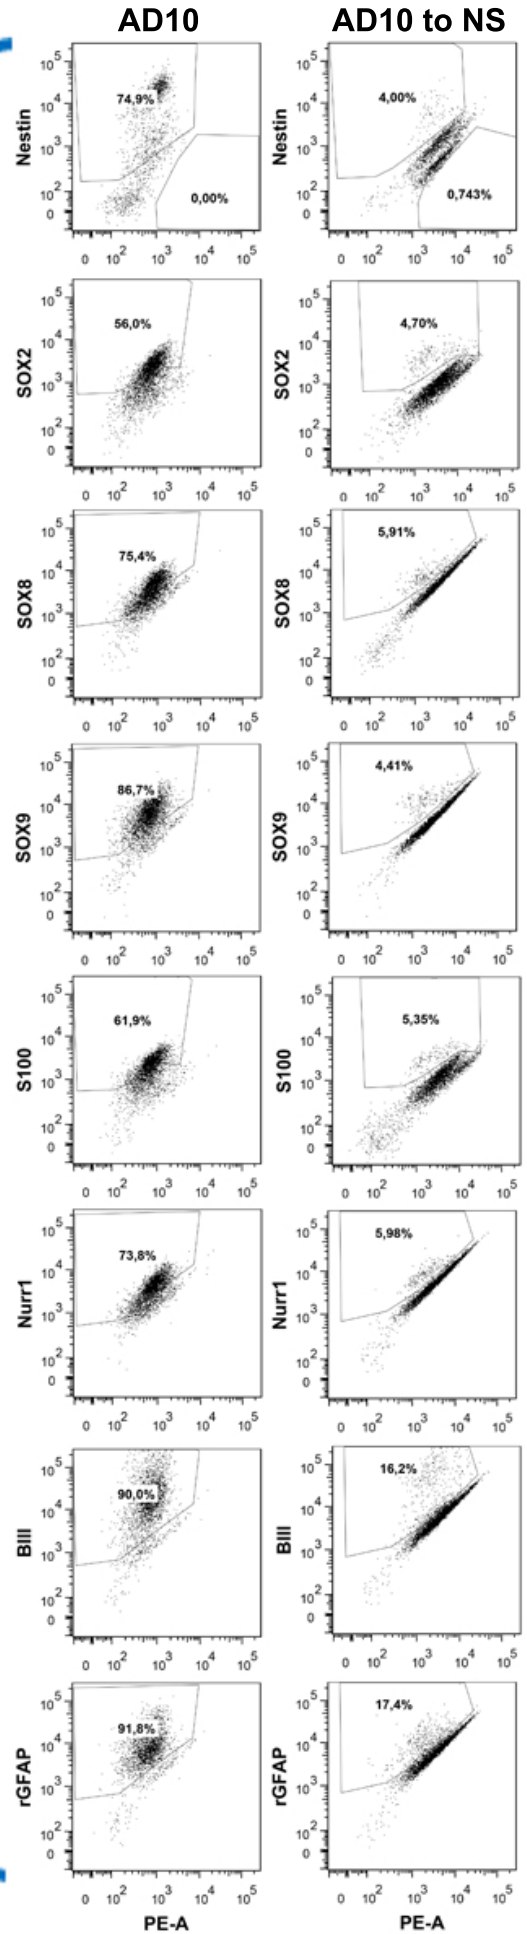

# Supplementary Fig. 3

a

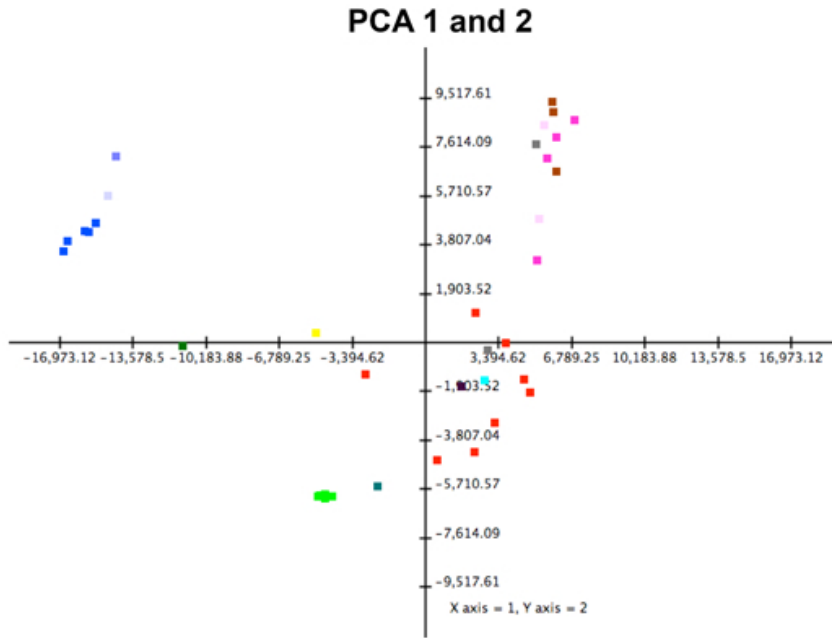

b

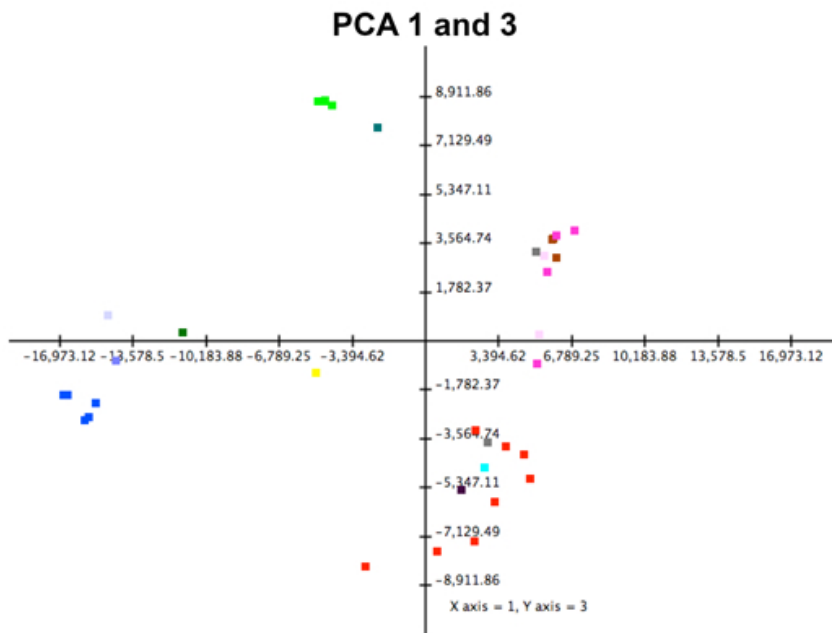

c

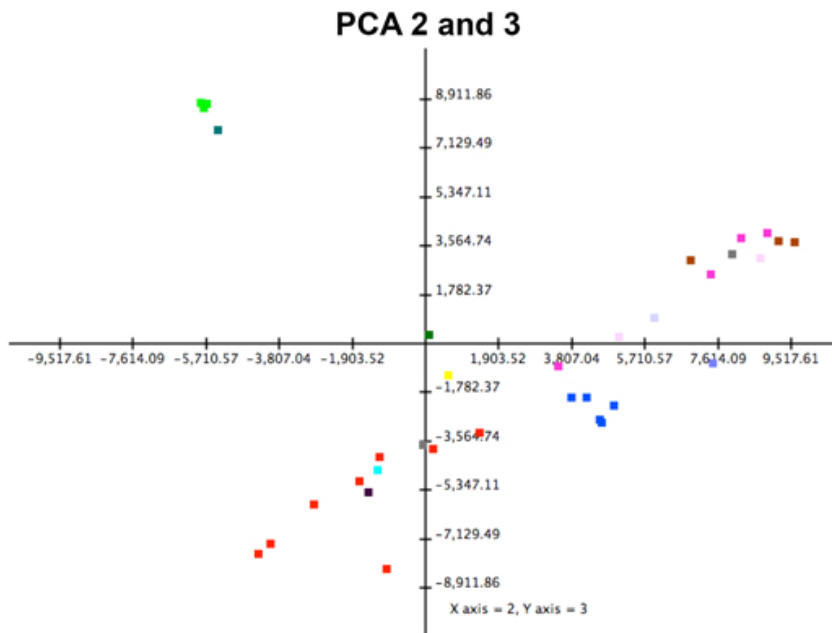



Supplementary Fig. 5

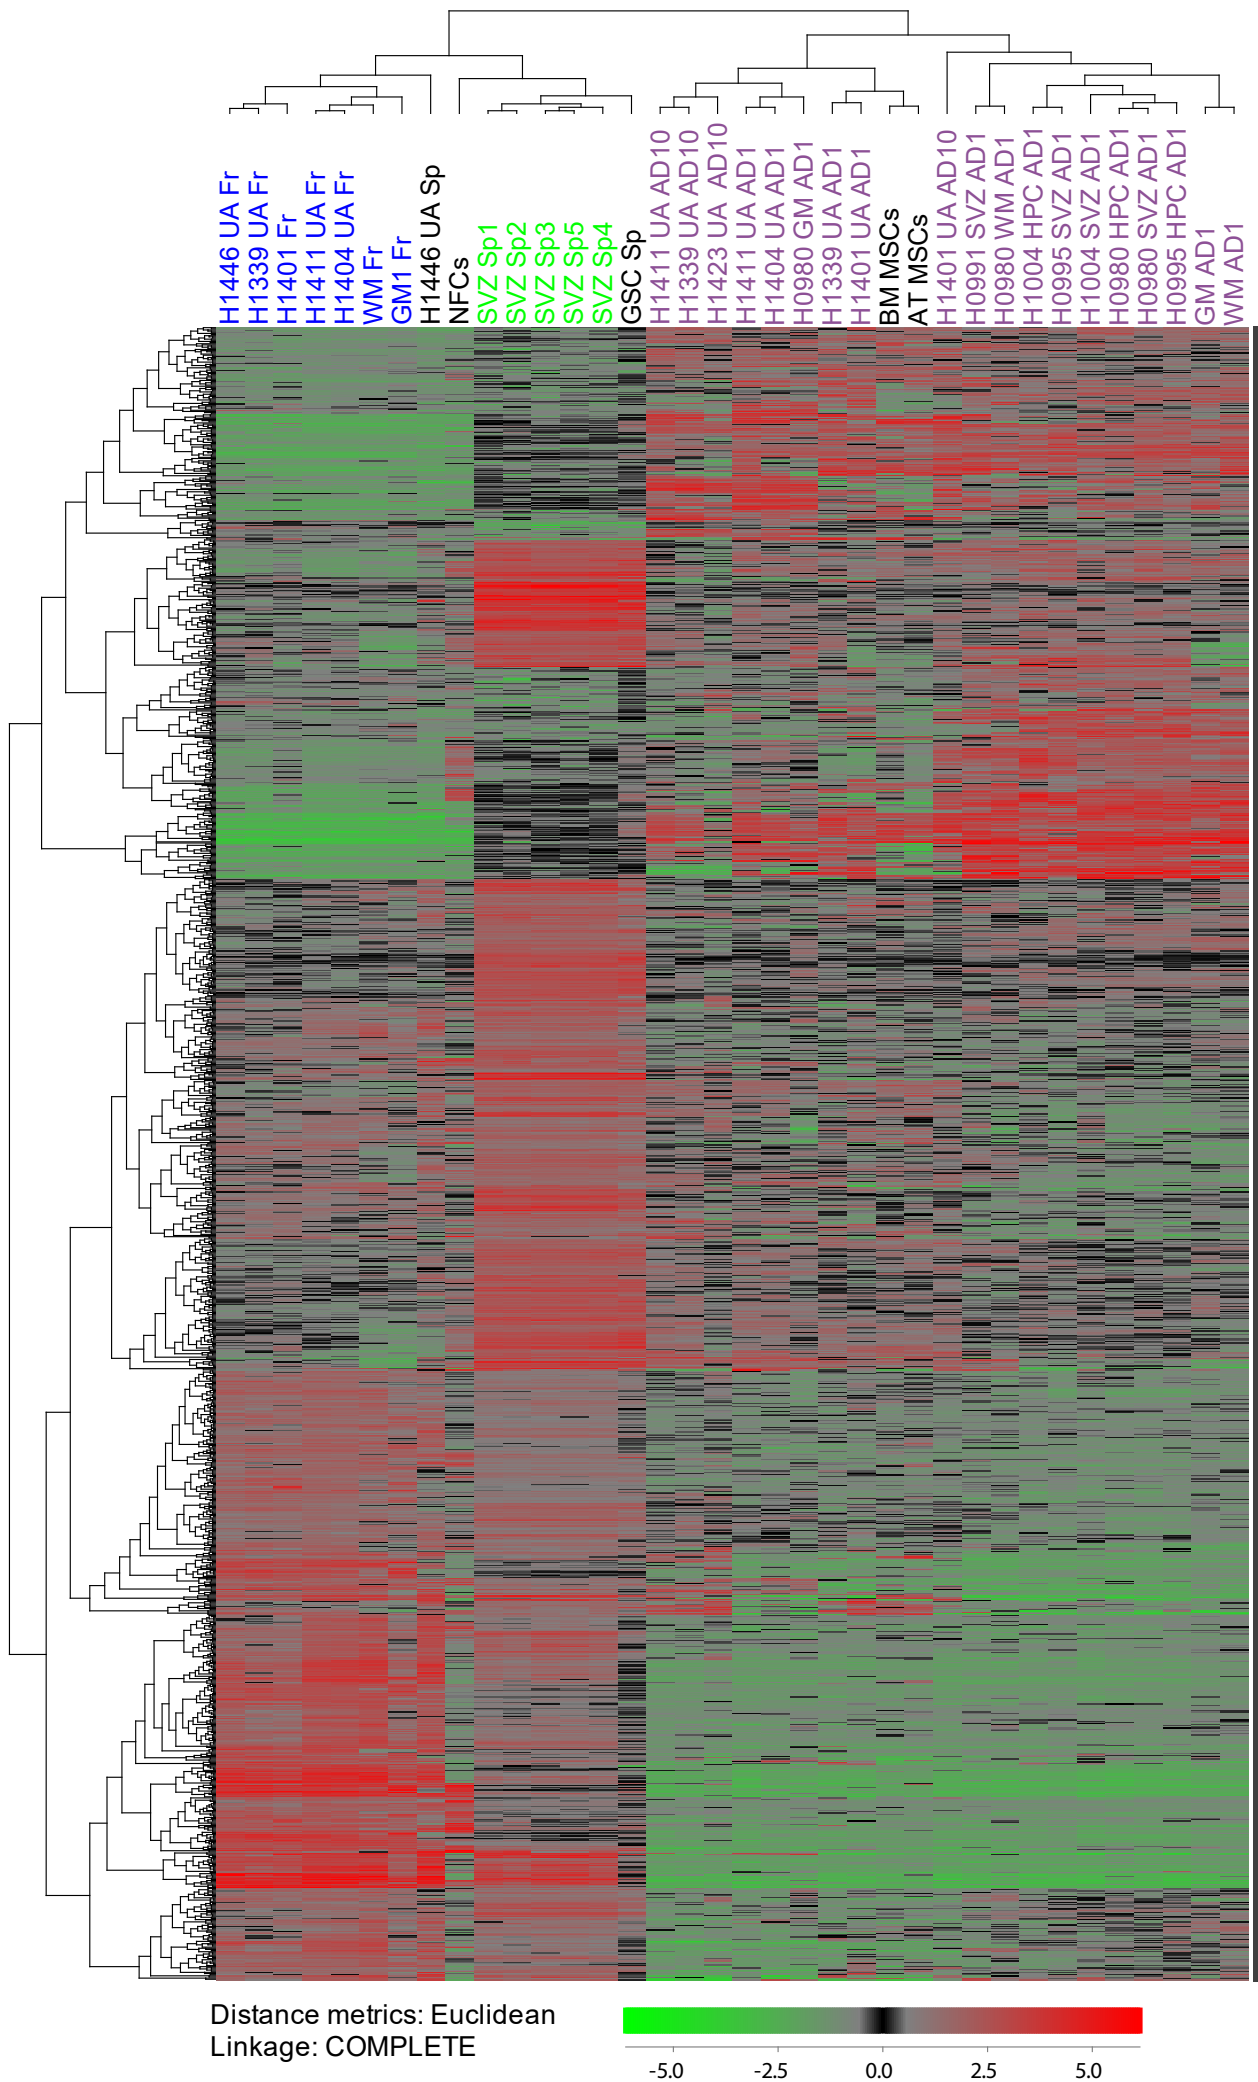

Supplementary Fig. 6

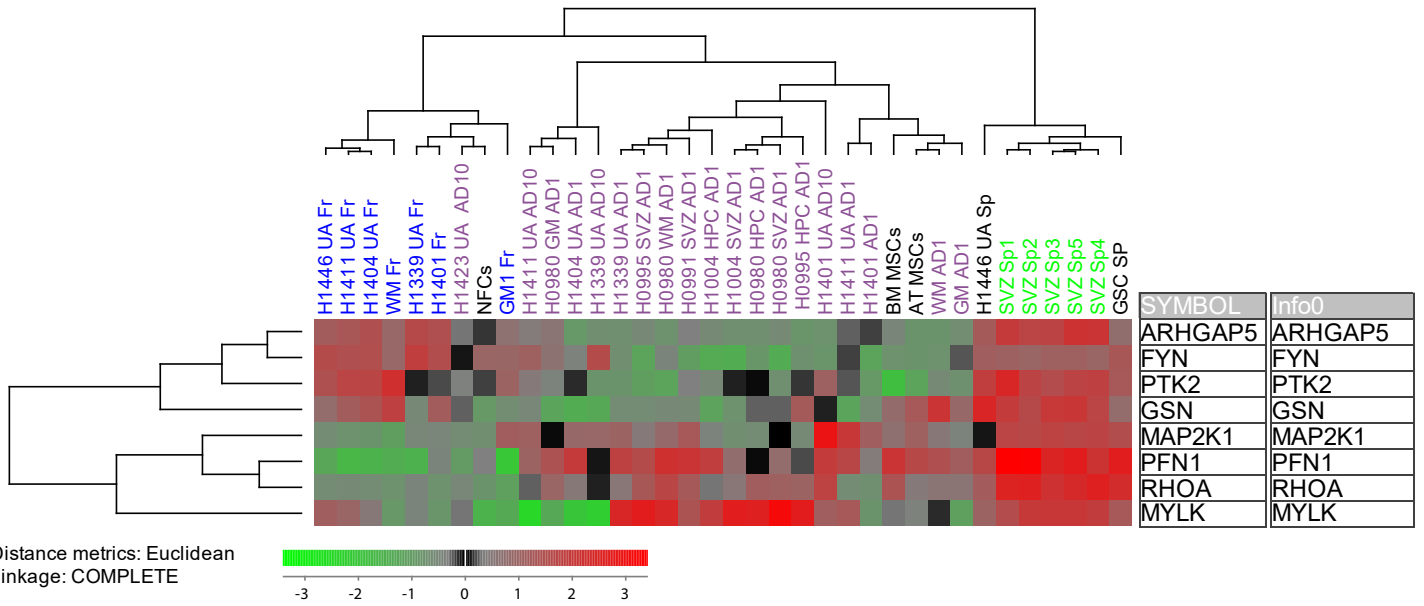



Supplementary Fig. 7

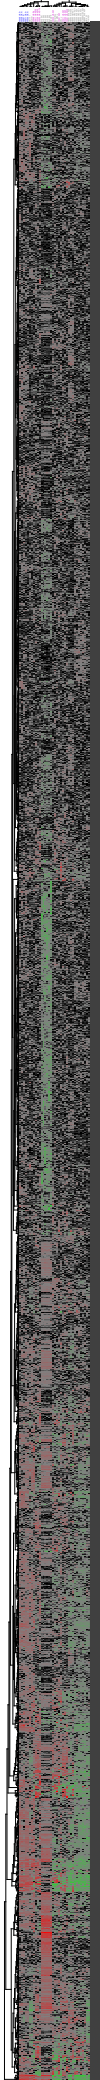

Supplement: cddis2017368x1.pdf [file cddis2017368x1.pdf]
